# Supplementary material for: Insights into nonlinear absorption transitions in a silver-incorporated reduced graphene oxide–molybdenum disulfide (Ag–rGO–MoS2) hybrid
Source: Royal Society of Chemistry journal article supplement (doi:10.1039/d4cp03039g), 2024-01-01

## Insights into Nonlinear Absorption Transitions in Silver Incorporated reduced Graphene Oxide-Molybdenum Disulfide (Ag-rGO-MoS<sub>2</sub>) Hybrid

Supplementary Information

### Figure S1

Figure S1 depicts extinction spectra extracted from the absorption spectra using Beer Lambert's law.

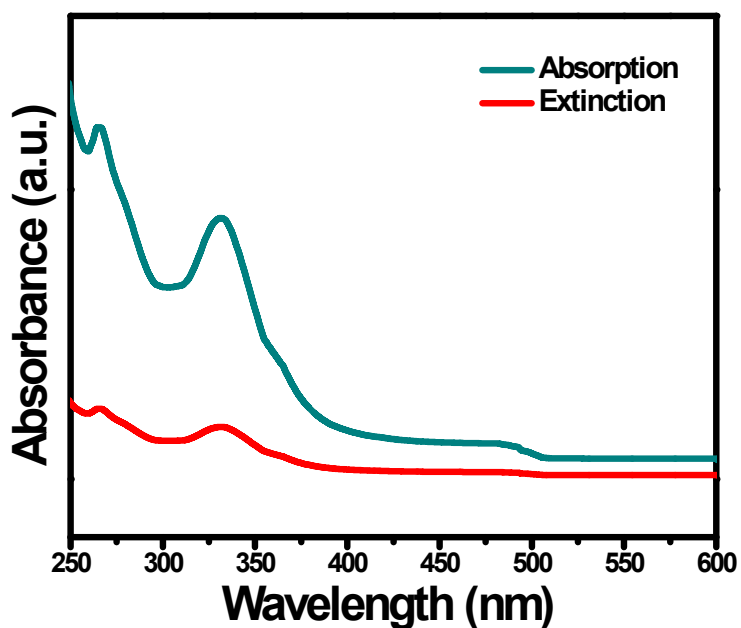

### Figure S2

Figure S2 depicts XRD spectrum of Ag-rGO-MoS<sub>2</sub> hybrid.

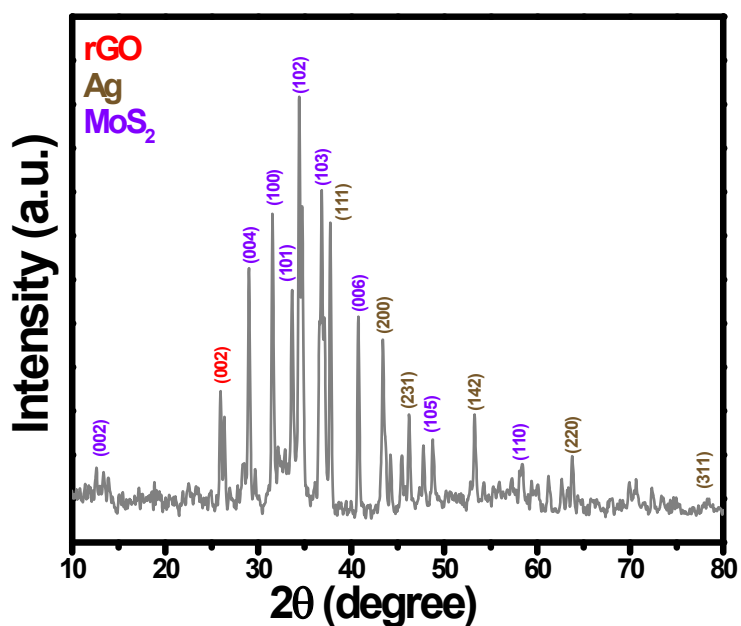

**Figure S3**

Figure S3 depicts Raman spectrum of Ag-rGO-MoS<sub>2</sub> hybrid.

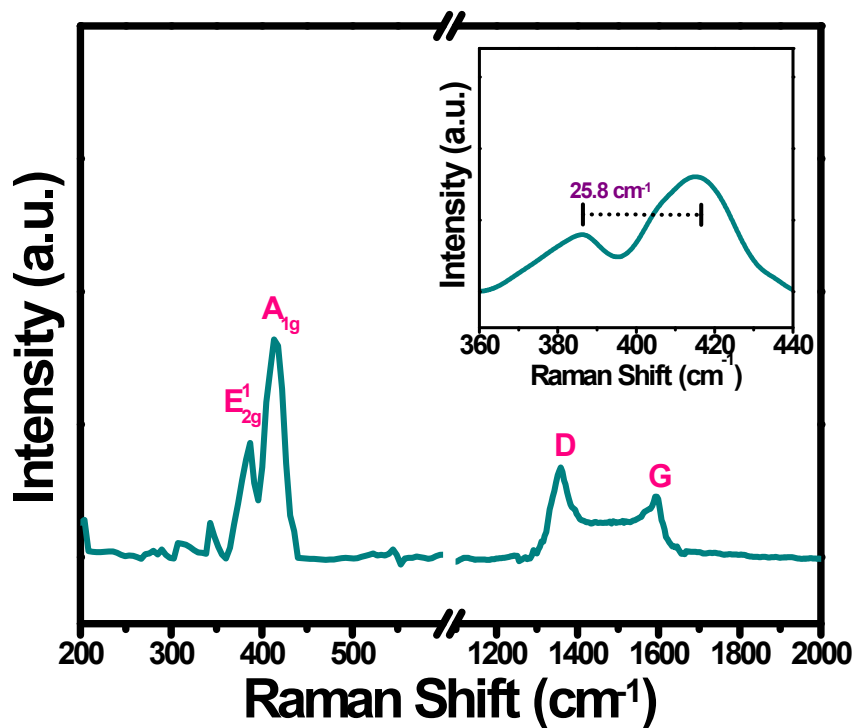

**Figure S4**

Figure S4 depicts EDS spectrum of Ag-rGO-MoS<sub>2</sub> hybrid.

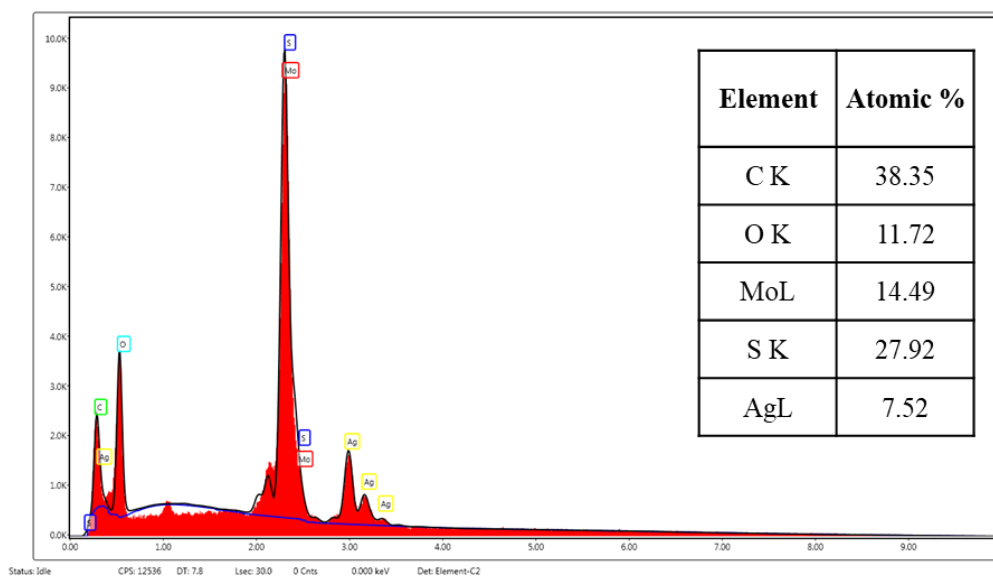

Supplement: d4cp03039g1.pdf [file d4cp03039g1.pdf]
